# Supplementary material
Source: Springer Nature journal article supplement (https://www.springermedizin.de/resource/supplementary/13045_2013_311_MOESM3_ESM.pdf/9661098)

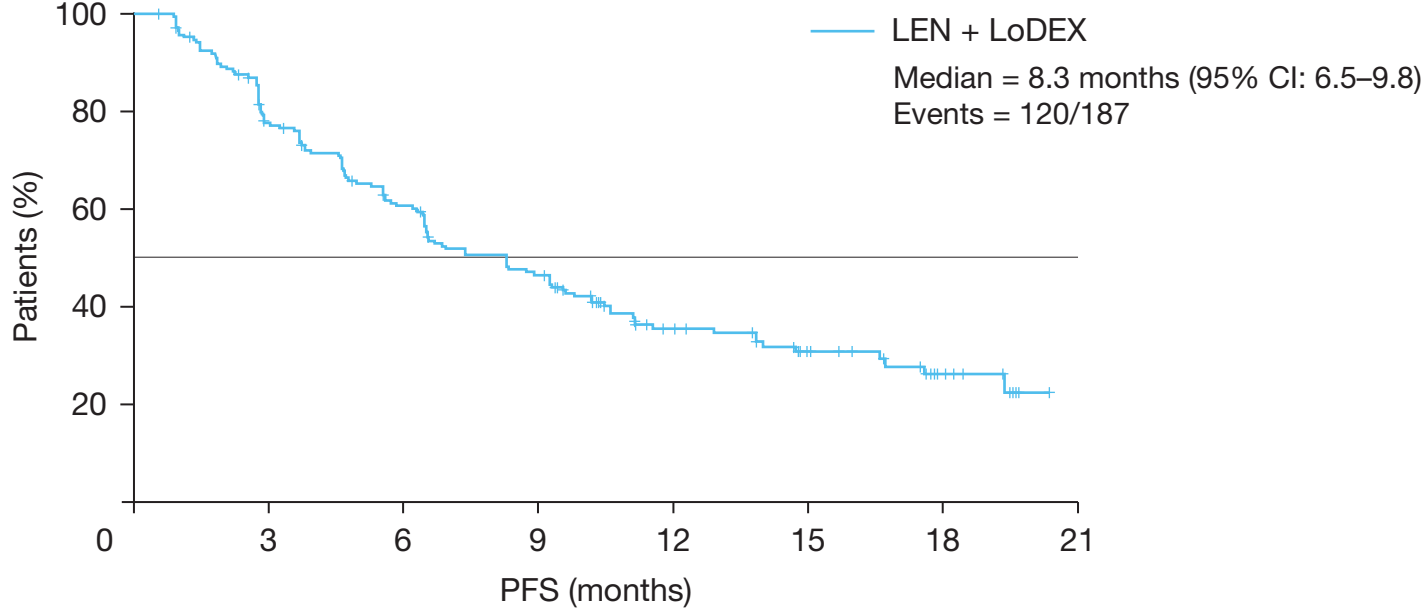

No. of patients at risk:

|     |     |     |    |    |    |    |   |
|-----|-----|-----|----|----|----|----|---|
| 187 | 139 | 105 | 78 | 43 | 26 | 11 | 0 |
|-----|-----|-----|----|----|----|----|---|

Supplement: MOESM3 [file 9661098]
